# Supplementary material
Source: PubMed Central journal article supplement (PMC7229661)
Supplement: pnas.2001250117.sapp.pdf [file pnas.2001250117.sapp.pdf]

**SUPPLEMENTARY MATERIAL FOR**  
**Cell Atlas of Aqueous Humor Outflow Pathways in Eyes of Humans and Four**  
**Model Species Provides Insights into Glaucoma Pathogenesis**

Tavé van Zyl, Wenjun Yan, Alexi McAdams, Yi-Rong Peng, Karthik Shekhar, Aviv Regev, Dejan Juric, and Joshua R. Sanes

## **MATERIALS & METHODS**

**Tissue Acquisition.** Human ocular tissues used for sequencing, immunohistochemistry and *in situ* hybridization were obtained from Massachusetts General Hospital in collaboration with the Rapid Autopsy Program, Susan Eid Tumor Heterogeneity Initiative. Eyes were collected a median of 6 hours postmortem (range 3-14hrs; see **Table S1**). The whole globe was immediately transported to the lab in a humid chamber on ice. Hemisection was performed at the pars plana and the anterior segment was then placed in Ames medium equilibrated with 95% O<sub>2</sub>/5% CO<sub>2</sub>. For sequencing, the following dissection was performed: after isolation of the anterior segment, the lens, iris, and ciliary body were removed with a gentle peeling method. The corneoscleral button was hemisected and a small wedge was set aside for fixation. Approximately 9 clock hours (or 270 degrees) of TM tissue was peeled from the scleral sulcus of the remaining tissue with jewelers' forceps. A permissive dissection technique allowed for adjacent tissue from the ciliary muscle to be incorporated into the collection tube if it was liberated in conjunction with the TM strip.

Other human corneoscleral buttons used for IHC and *in situ* hybridization were provided by the Lions Vision Gift (Portland, OR) and were collected <16 hr postmortem and fixed in ice-cold 4% PFA. No ocular disease was reported in any of the human donors and no abnormalities were noted during microdissection. Donor details are provided in Table S2.

Non-human primate eyes were obtained from macaques 4 to 10 years of age that had reached the end of unrelated studies at supplying institutions. No ocular or visual abnormalities were noted. Data presented in this manuscript did not covary with any treatment that had been applied to the animals. For sequencing, two eyes from one female crab-eating macaque (*Macaca fascicularis*, 6 years of age) were used, and two eyes from one male rhesus macaque (*Macaca mulatta*). Eyes were collected either pre-mortem under deep anesthesia or post-mortem ( $\leq 45$  min), after which a rapid hemisection was performed and the anterior immediately placed in ice-cold Ames solution (Sigma-Aldrich; equilibrated with 95% O<sub>2</sub>/5% CO<sub>2</sub> for all use), where they were stored before experimentation. Experiments described below commenced within 6 hours of death.

Porcine (*Sus scrofa*) eyes were obtained from a local abattoir, transported back to the lab in a humid chamber on ice, and dissected as above. For sequencing, 2 eyes from 2 individual pigs were used. Due to the porcine iridocorneal anatomy, TM strips were not dissected, and instead, corneoscleral wedges were trimmed and digested *in toto*.

Mouse eyes were collected from male and female 12-week-old CD1 mice obtained from Charles River Laboratories. After euthanasia, eyes were enucleated and transferred to Ames medium equilibrated with 95% O<sub>2</sub>/5% CO<sub>2</sub>. The anterior segment was dissected from the posterior portion of the eye with microscissors, and the lens was gently removed with forceps. The entire anterior segment, including cornea, iris, ciliary body, and the TM was digested.

**Single cell isolation.** Tissues were digested enzymatically for 30 minutes at 37°C with papain (Worthington, LS003126) 20 units/mL in Ames. Following digestion, the tissues were triturated into single cell suspensions with 0.15% ovomucoid and 0.04% bovine serum albumin (BSA) in Ames solution and filtered through a 40 µm strainer. Single cell suspensions were diluted at a concentration of 500-1800 cells/µL in 0.04% non-acetylated BSA/Ames for loading into 10X Chromium Single Cell Chips (64). Data were obtained using both v2 and v3 kits and specified in **Table S1**.

**Droplet-based scRNA-seq.** Single cell libraries were generated with either Chromium 3' v2 or v3 chemistry (10X Genomics, Pleasanton, CA) following the manufacturer's protocol. Briefly, single cells were partitioned into Gel bead in Emulsion (GEMs) in the GemCode instrument with cell lysis and barcoded reverse transcription of RNA, followed by amplification, shearing and 5' adaptor and sample index attachment. On average, approximately 10,000 single cells were loaded on each channel and approximately 6,000 cells were recovered. Libraries were sequenced on Illumina HiSeq 2500.

**Histology.** See **Table S2** for donor information. Corneoscleral wedges were fixed in 4% PFA for 2-24 hr, transferred to PBS, sunk in 30% sucrose overnight, then embedded in tissue freezing medium and mounted onto poly-d-lysine coated slides in 20 µm meridional sections with ProLong Gold Antifade (Invitrogen). For IHC, slides were incubated for 1 hr in protein block, overnight with primary antibodies, and 2 hr with secondary antibodies. Initial block and secondary antibody incubation were done at room temperature and primary antibody incubation at 4°C. Single molecule fluorescent *in situ* hybridization was performed using commercially available RNAScope Multiplex Fluorescent Assay V2 (Advanced Cell Diagnostics, Newark, CA). Briefly, slides were baked at 60°C for 30 minutes and incubated for 10 minutes at RT with hydrogen peroxide. Two Protease III incubations were performed (30 min, then 15 min). Probe hybridization and subsequent steps were per standard manufacturer protocol. Antibodies and *in situ* probes are catalogued in **Table S3**.

**Image acquisition, processing and analysis.** Images were acquired on Zeiss LSM 710 confocal microscopes with 405, 488-515, 568, and 647 nm lasers, processed using Zeiss ZEN software suites, and analyzed using ImageJ (NIH). Images were acquired

with 20X, 40X or 100X oil lens at the resolution of 1024X1024 pixels, a step size of 1.0  $\mu\text{m}$ , and 90  $\mu\text{m}$  pinhole size.

### **Computational Methods.**

*Clustering analysis:* Sequencing data was demultiplexed and aligned using the cellranger (10X Genomics) mkfastq and count functions respectively (cellranger version 2 for samples collected with v2 kit and version 3 for samples collected with v3 kit). Reads were aligned to the following reference genome: Human samples-GRCh38, Macaca Mulatta-Mmul8, Macaca Fascicularis-MacFas5 with our augmented transcriptome file (65), Pig-Sscrofa11, Mouse-mm10. The number of genes/transcripts detected per cell was plotted for every sample and a threshold was chosen based on their distributions for each species. Cells with fewer than 600 genes were excluded from further analysis for primates and pig; the threshold for mouse was 1000 genes/cell.

The analysis pipeline follows methods described by Peng *et al.* (65). For each species, the Unique Molecular Identifier (UMI) count matrix was normalized by the total number of UMI counts for each cell and multiplied by a scale factor, representing the median UMI counts of the group to correct library size differences. The normalized UMI count matrix was then log transformed after adding 1. High Variable Genes (HVG) were identified using method described in Pandey *et al.* (66). For every gene, the mean ( $\mu$ ) and coefficient of variation (CV) of UMI counts among cells within each group was calculated. The excess CV (eCV) was measured by subtracting the predicted value from a Poisson-Gamma mixture based null model of CV v.s.  $\mu$ . HVGs were defined as genes whose  $eCV > [\text{mean of eCV}] + 1.3 * [\text{SD of eCV}]$ . Batch correction was performed on the expression matrix of HVGs using linear regression model adapted from the 'RegressOut' function in the 'Seurat' R package.

Principal Component analysis (PCA) was performed on the batch-corrected expression matrix of the HVGs. The top 90 PCs were calculated using the 'irlba' R package on centered and scaled data. Statistically significant PCs were estimated based on the Tracy-Widom distribution (67). The PCA-reduced data was projected to 2D using t-distributed stochastic neighbor embedding (t-SNE) for visualization. Unsupervised Louvain-Jaccard clustering method was applied to cells in the PCA reduced dimensional space of the significant PCs (68). Clusters formed by either low quality cells or doublets were removed before further analysis. Clusters containing low quality cells could be identified by a combination of the following: lower median number of genes/transcripts per cell, higher proportion of reads from mitochondrial genes, and lack of uniquely expressed genes. Clusters containing doublets could be identified by their overall higher number of genes/transcripts than other clusters, high expression levels of marker genes from multiple cell types, and also lack of uniquely expressed genes.

To assess the overall relationships among clusters, a dendrogram was built in each species using normalized expression matrix of HVGs. To correct for potential over-clustering due to batch effect, or the lack of computation power in distinguishing types, the following steps were taken. To address the first issue, cluster pairs that were located closest to each other on the dendrogram were tested, and they were merged iteratively until sufficient differences were found between the current cluster pair ( $\geq 5$  DE genes

enriched both ways, log fold-change >1.2, adjusted p value < 0.001; statistical testing was performed using the 'MAST' R package). After each merge, a new dendrogram was built for testing the new pair. To address the second issue, sub-clustering was performed on each cluster with newly defined HVGs among cells and using previous described testing method for verification.

In most cases, result from sub-clustering represented over-clustering; however, in some cases, we were able to distinguish real types (i.e. the human Schlemm canal and collector channel cells were grouped as one cluster at the initial clustering, but split into two at the sub-clustering step). In other cases, the lack of clustering power was due to limited sample size, as for all the species we analyzed except the human. Referring to the cross-species mapping (described below) to first spot the cluster as a potential cell type mixture in non-human dataset, we used supervised methods to separate them with type markers found in human. For example, the Schlemm canal and collector channel in *M. fascicularis* were initially clustered as a single type using unsupervised methods, but the human type markers were present in separate cell populations (**Figure S5B**), allowing us to split the cluster. Subsequently, criteria described above were applied to verify the new clusters. Due to differences in the dissection method, we obtained a large amount of corneal epithelium from our mouse collection. The presence of these cells saturated the dynamic range in feature space and weakened our computational power in classification of other types; therefore, the majority of corneal epithelium was removed at the initial analysis.

*Cross species comparison:* To evaluate the transcriptomic similarity between human and other model species, we applied a gradient boosted decision tree algorithm, XGBoost (56) using the 'xgboost' R package. We used the human dataset for training because it was the largest. Classifiers were trained on 80% of the human dataset using the HVGs shared between human and each of the other species. The remaining 20% were used as a validation dataset to evaluate the accuracy of the classifier; for all four classifiers built, the validation accuracies were >95%. Data from non-human species were used as the testing dataset whereby cells that get more than a 16% vote (calculated from the equation below) for the 'winner' type are assigned with human type identity, while those failing to pass the criteria are assigned as 'unmapped'. The criteria is calculated as promotion of winning votes  $\geq 3 \times \frac{1}{\# \text{ of types}}$ , where # of types in the human dataset is 19. In some cases, a single cluster in the testing dataset might map to two types in the training dataset, and this serves as a clue of potential cell type mixture as mentioned previously. Further sub-clustering and verification was performed accordingly.

**Data availability:** The accession number for the raw and unprocessed data files reported in this paper is GEO: GSE146188. Data can be visualized at the Broad Institute's Single Cell Portal at [https://singlecell.broadinstitute.org/single\\_cell/study/SCP780](https://singlecell.broadinstitute.org/single_cell/study/SCP780).

**Study Approval.** All animal procedures performed in this study were conducted in compliance with the Association for Research in Vision and Ophthalmology's Statement for the Use of Animals in Ophthalmic and Vision Research and guidelines for the care and use of animals and human subjects at Harvard University and Partners Healthcare. Acquisition and use of human tissue was approved by the Human Study Subject Committees (DFCI Protocol Number: 13-416 and MEE - NHSR Protocol Number 18-034H). Acquisition and use of non-human tissue was approved by the Institutional Animal Care and Use Committee (IACUC) at Harvard University.

## SUPPLEMENTARY FIGURE LEGENDS

### Figure S1

- A. Workflow for obtaining single cell transcriptomes.
- B. Dissection procedure. Left: anterior segment following dissection at the pars plana, posterior view. Middle: blunt dissection of TM strip following removal of lens, iris and ciliary body. Right: Strip of isolated TM.

### Figure S2 Histological Characterization of Human Outflow Pathways

- A. Beam cells immunostained with *PDPN* (green) and *FABP4* (red). Schlemm canal outlined in dashed line. AF, Autofluorescence.
  - B. Enlargement of boxed area in A.
  - C. Ciliary muscle cells co-immunostained for *CHRM3* (green) and *DES* (red).
  - D. Pericytes immunostained for *NDUFA4L2* (green), wrapped around a vessel stained with *PECAM1* (red).
  - E. Neuron within the ciliary muscle immunostained for *ELAVL4/HuD* (red).
  - F. Mast cells within the TM immunostained for *IL1RL1* (green).
  - G. B cells within the TM immunostained for *CD27* (green).
  - H. Immunostaining against *ADH1B* (green) highlights scleral fibroblasts in the vicinity of TM and SC. This image is shown in higher magnification in **Figure 3H**.
  - I. Fluorescent RNA *in situ* hybridization against *ANGPTL7* (green) and *CHI3L1* (red) highlights cells in the JCT. Schlemm canal outlined in dashed line. A cropped version of this image is shown in higher magnification in **Figure 3E**.
  - J. Fluorescent RNA *in situ* hybridization against *TMEFF2* (red) and *PPPR1B1* (green) highlights beam cells. A cropped version of this image is shown in higher magnification in **Figure 3D**.
  - K. Fluorescent RNA *in situ* hybridization against *RARRES1* (green) and *CYP1B1* (red) demonstrates positive signal within beam cells > JCT.
  - L. Enlargement of area boxed in K.
- Scale bar = 50µm.

### Figure S3 Expression of Disease-Associated Genes

Heat map showing expression of genes implicated in glaucoma by key human cell types. Genes detected in more than 10% cells of at least one type were shown.

Expression strength of each gene is row-normalized. TM, trabecular meshwork; CM, ciliary muscle; cEndo, canal endothelium.

#### **Figure S4 Gene Expression in Disease-Relevant Pathways**

Dot plot showing human cell-type specific expression patterns of complement factors (A); aquaporins (B); matrix metalloproteinases (C); Rho genes (D); Cytochrome P450 enzymes (E); and prostaglandin related genes (F).

#### **Figure S5 Analysis of cell types and gene expression in *M. fascicularis***

**A** Violin plot showing examples of genes selectively expressed by each cell type in *M. fascicularis*.

**B** Supervised clustering of Schlemm Canal and collector channels in *M. fascicularis*.

**C-H** Histological localization of cluster markers in meridional sections of iridocorneal angles from *M. fascicularis* confirms identities of computationally derived cell types.

PDPN (red) stains trabecular beams (C-F) but also melanocytes within the ciliary muscle (CM) identified through co-staining with *MLANA* (green, H); Schlemm canal is outlined with PECAM1+ (red) immunostaining whereas CM is highlighted with immunostaining against DES (green, G); CDH19 (green) highlights Schwann cells in CM (F). Fluorescent RNA *in situ* hybridization against *RARRES1* (green) and *CYP1B1* (red) highlights cells in the TM (Beams > JCT).

Bars show 50µm in C-E, G and H, and 25µm in F.

#### **Figure S6. Histological characterization of outflow cell types in Pig**

**A** Immunostaining against PECAM1 (green) highlights both the Aqueous plexus (AqP) and a downstream collector channel/scleral vessel whereas LYVE1 (red) stains only the AqP.

**B** Immunostaining against *ACTA2* (green) highlights ciliary muscle and pericytes (asterisk).

**C.** Immunostaining against *NDUFA4L2* (green) is strongest at the border of iris vessels, indicating pericytes, but also shows weak staining in the TM and corneal endothelium, consistent with transcriptional data.

Bars show 50µm.

#### **Figure S7 Expression of key marker genes in mouse**

Violin plots showing expression of key marker genes in mouse.

#### **Figure S8. Comparison of gene expression across species**

Key genes are shown in dot plots for cell types comprising the vessel endothelium (A) Schwalbe line / Corneal endothelium (B) and immune cells (C).

## SUPPLEMENTARY TABLES

### Table S1

Information about human donor eye tissue used for scRNA-seq. Pt, Patient; RT, right eye; LT, left eye; MGH, Massachusetts General Hospital; DTP, death to processing time. Column labeled “10X” refers to the version of the 3’ single cell chemistry (as a commercially available kit from 10X Genomics) utilized for scRNA-seq library preparation.

### Table S2

Information about human donor eye tissue used for histological validation. Pt, Patient; RT, right eye; LT, left eye; HCS, human corneoscleral rim; MGH, Massachusetts General Hospital; LVG, Lions Vision Gift; DTP, death to preservation; IHC, immunohistochemistry. Column labeled “RNA *in situ*” indicates RNAScope probes used. Column labeled “IHC” indicates antibody targets used for localization.

### Table S3

Antibodies and probes used for histological studies.

## REFERENCES CITED IN SUPPLEMENTARY MATERIAL

64. G.X. Zheng *et al.*, Massively parallel digital transcriptional profiling of single cells. *Nat Commun.* **8**, 14049 (2017).
65. Y.R. Peng *et al.*, Molecular classification and comparative taxonomics of foveal and peripheral cells in primate retina. *Cell* **176**,1222-1237 (2019).
66. S. Pandey, K. Shekhar, A. Regev, A.F. Schier, Comprehensive identification and spatial mapping of habenular neuronal types using single-cell RNA-seq. *Curr. Biol.* **28**, 1052-1065 (2018).
67. N. Patterson, A.L. Price, D. Reich, Population structure and eigenanalysis. *PLoS Genet.* **2**, e190 (2006).
68. K. Shekhar *et al.* Comprehensive classification of retinal bipolar neurons by single-cell transcriptomics. *Cell* **166**, 1308-1323 (2016).

Figure S1

A

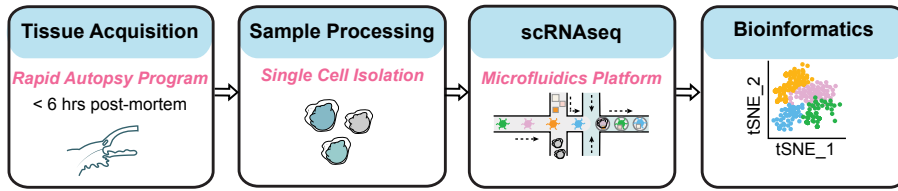

B

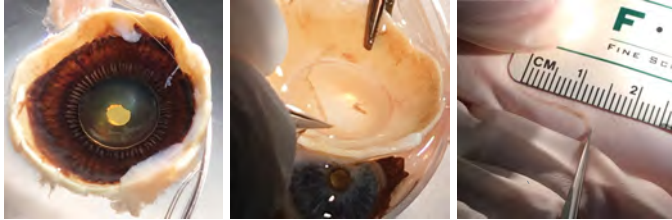



Figure S2

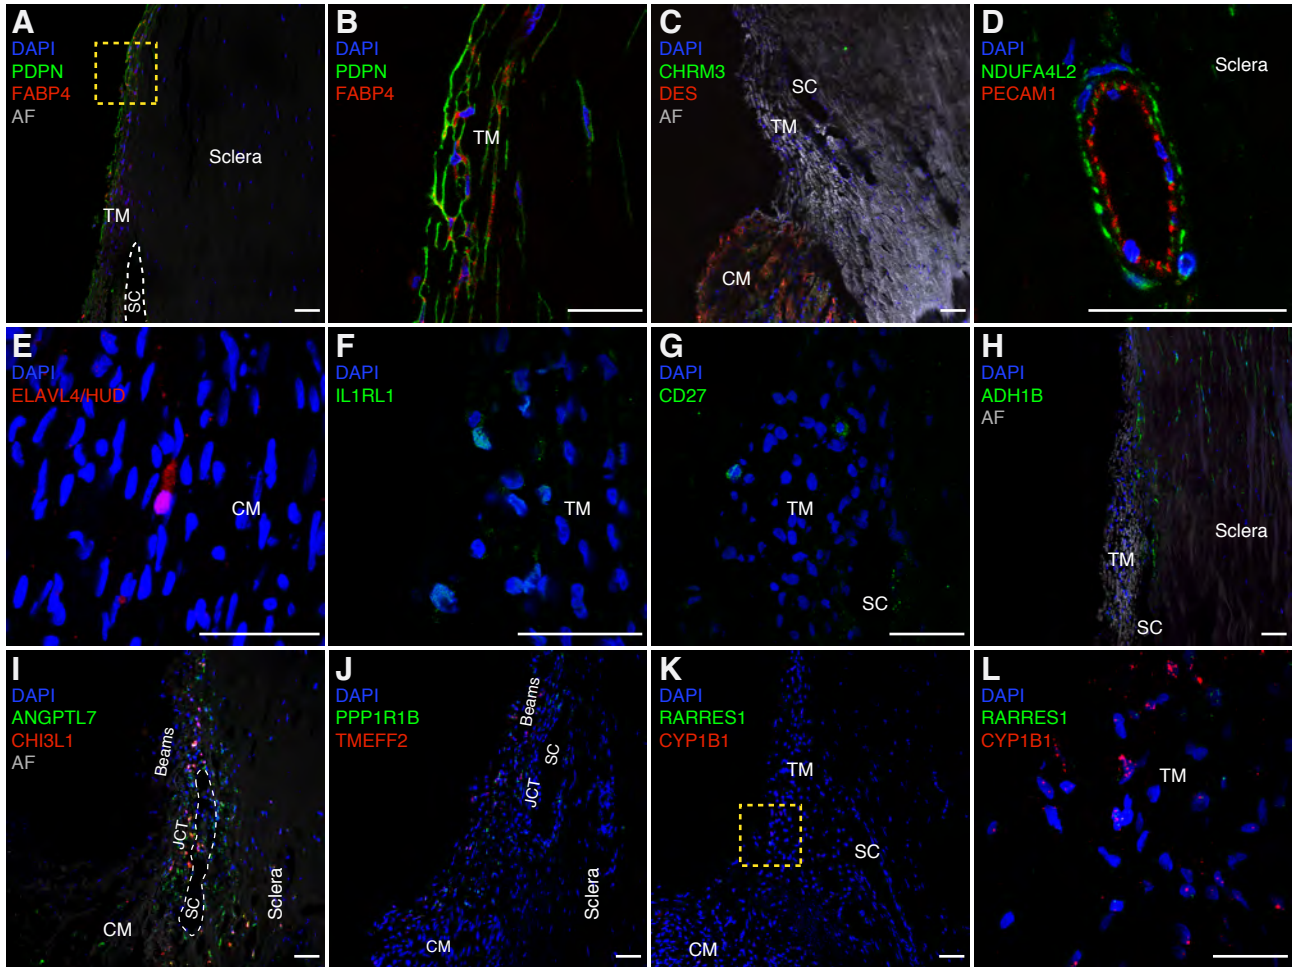

Figure S3

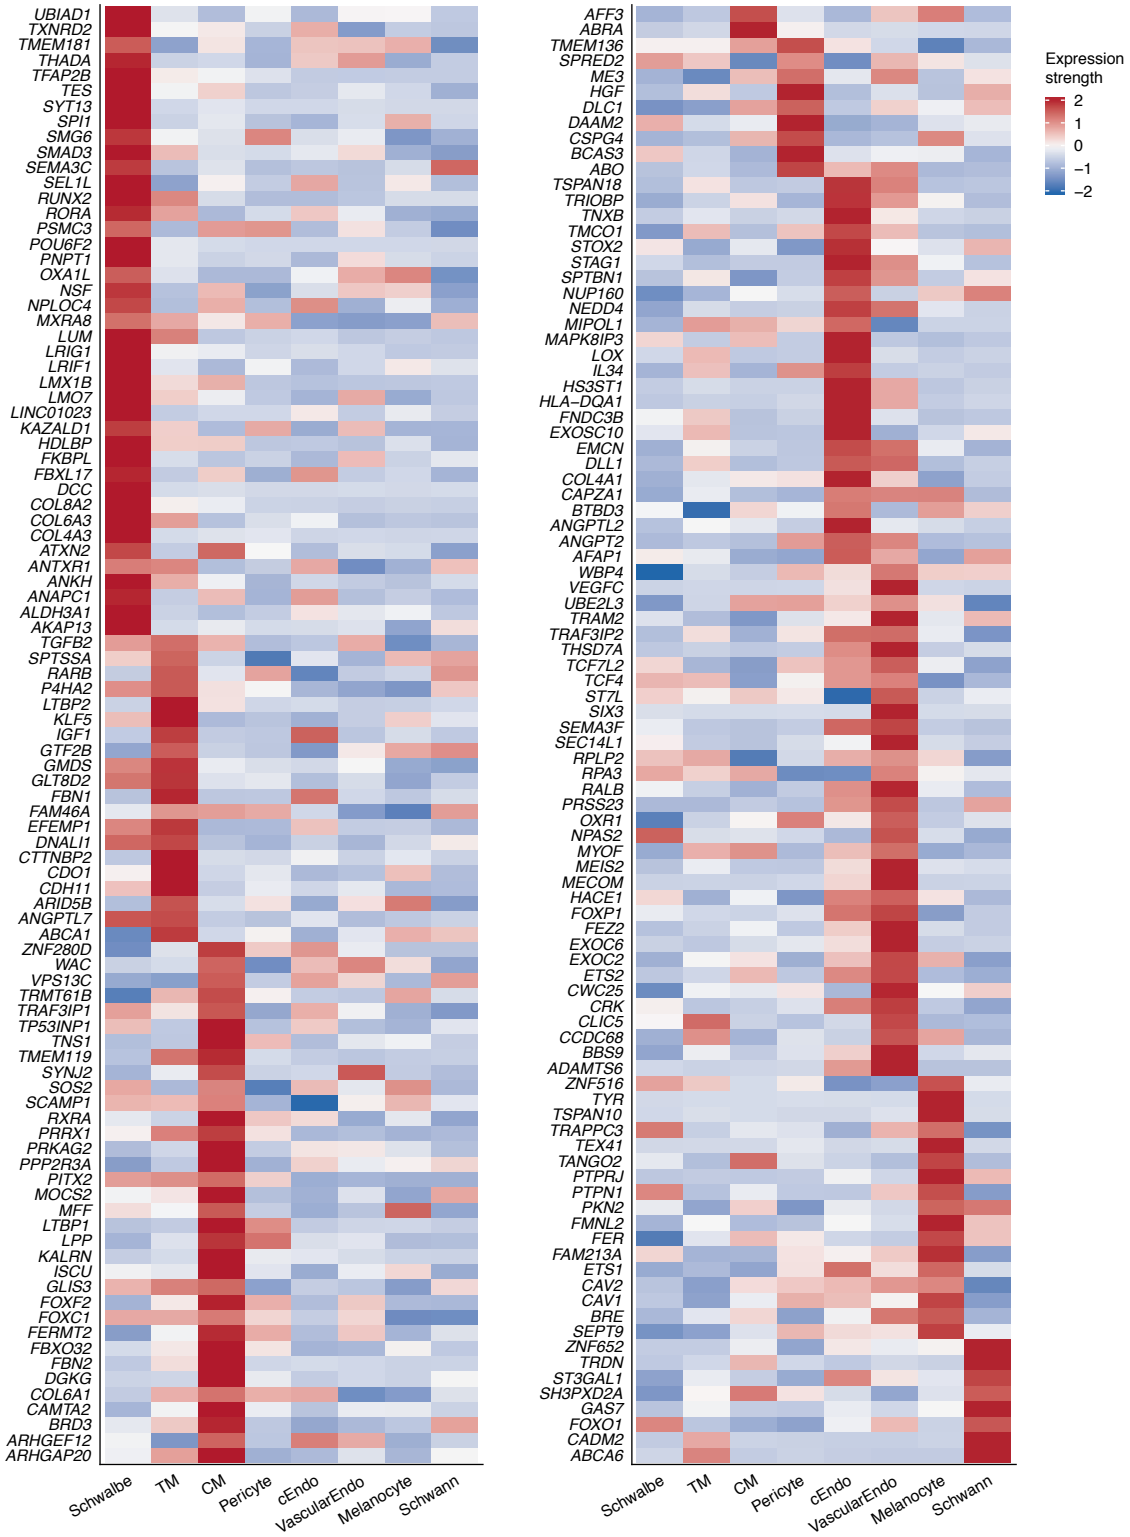

**Figure S4**

**A**

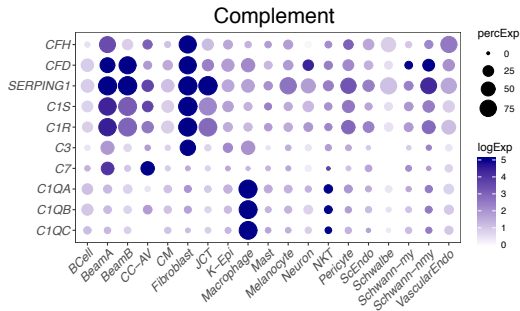

**B**

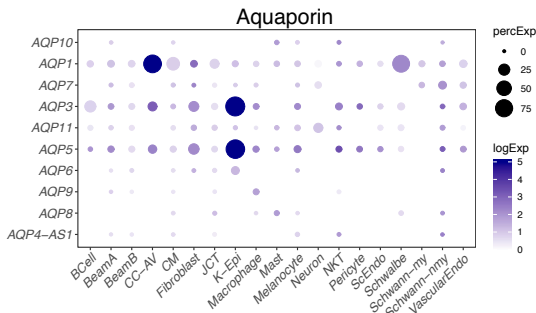

**C**

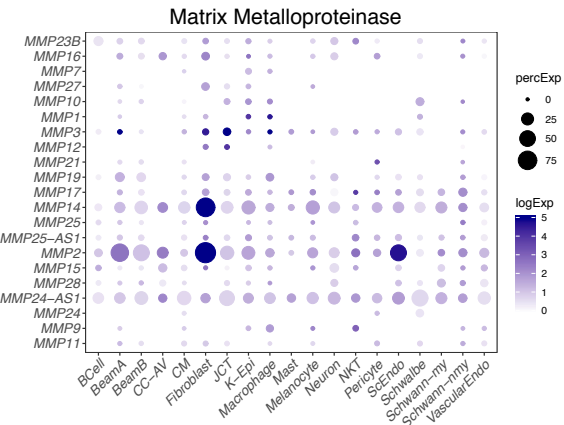

**D**

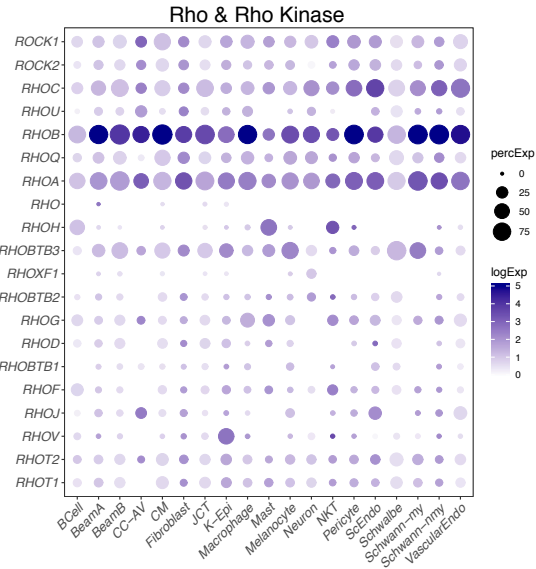

**E**

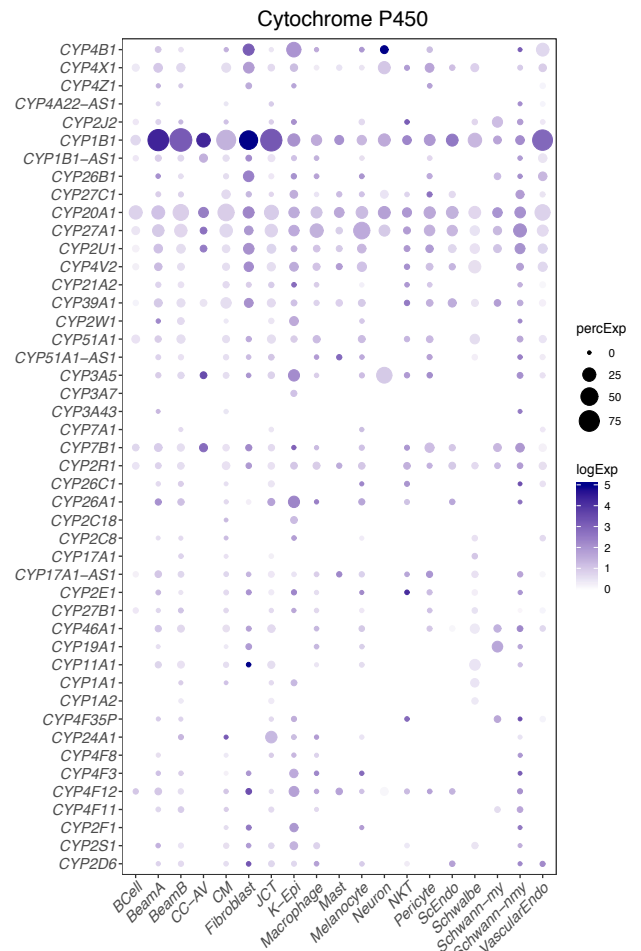

**F**

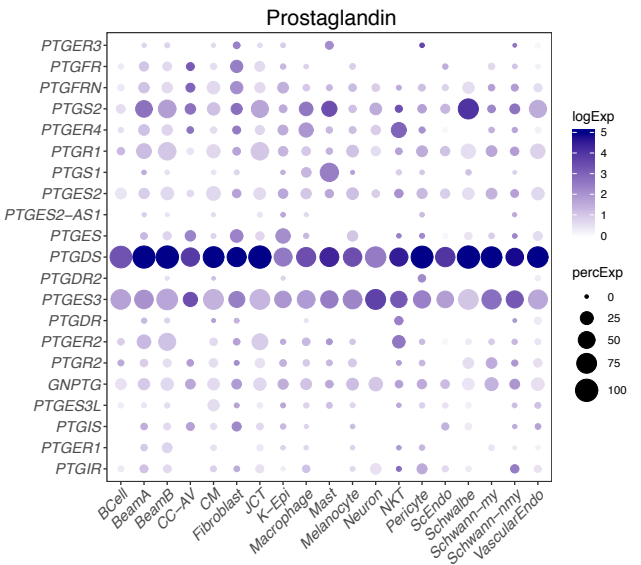

**Figure S5**

**A**

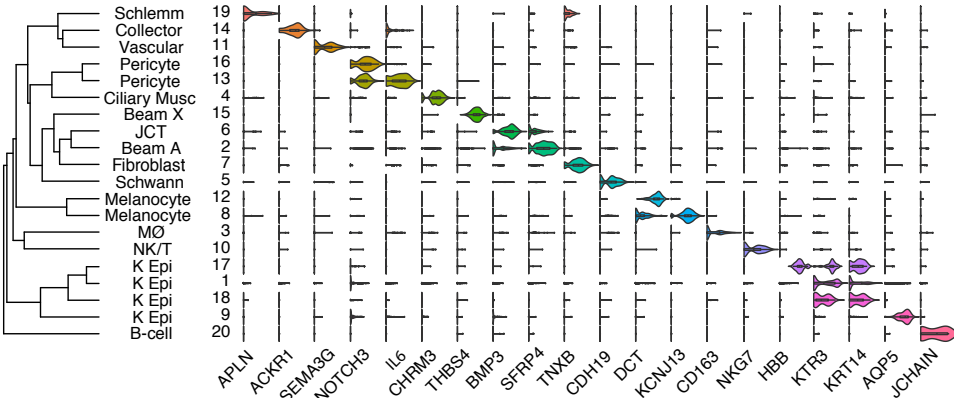

**B**

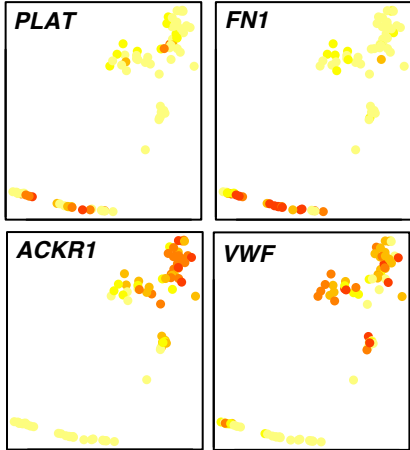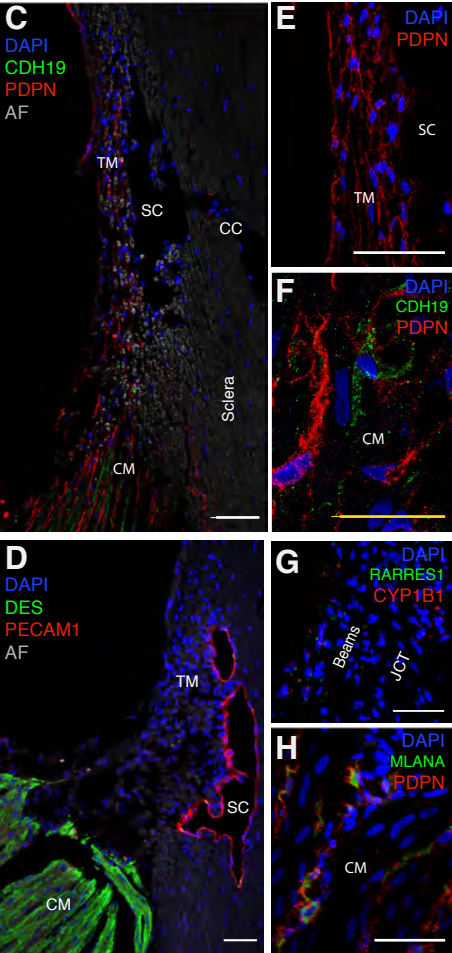

**Figure S6**

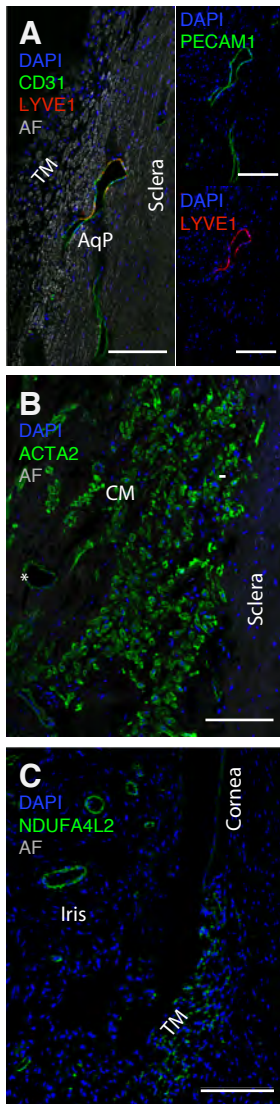

Figure S7

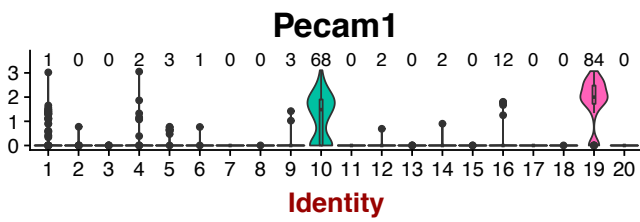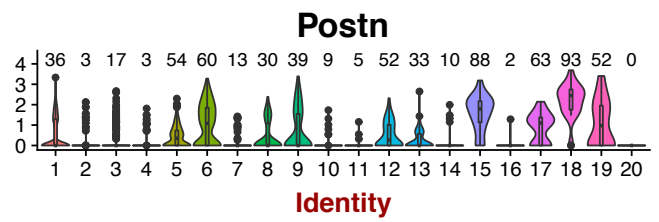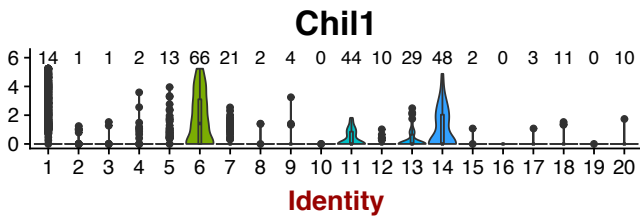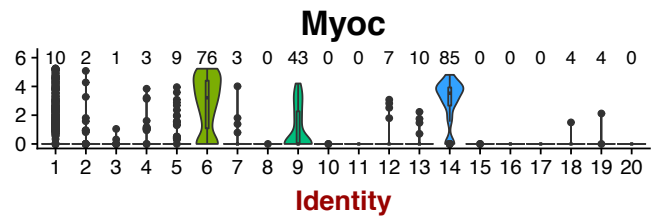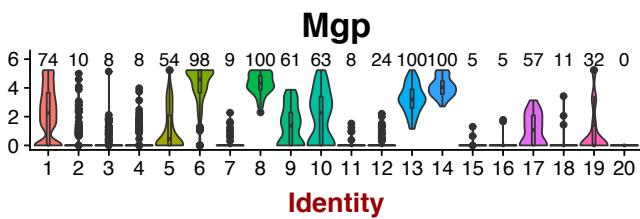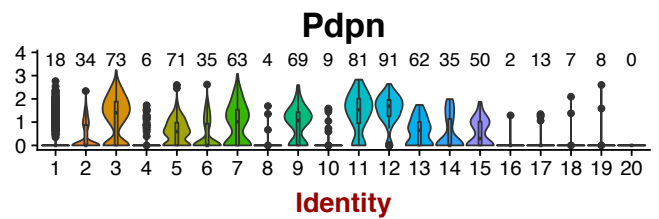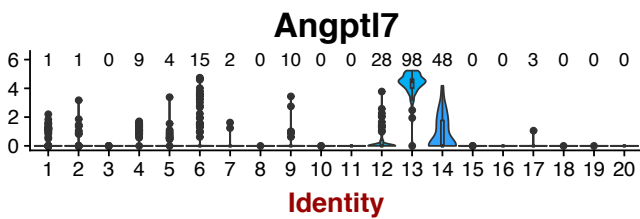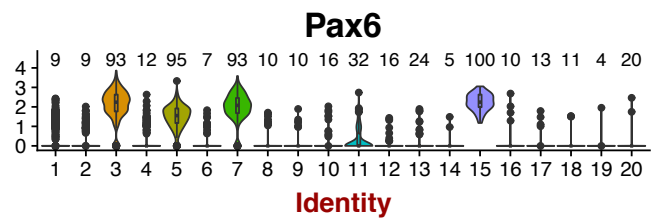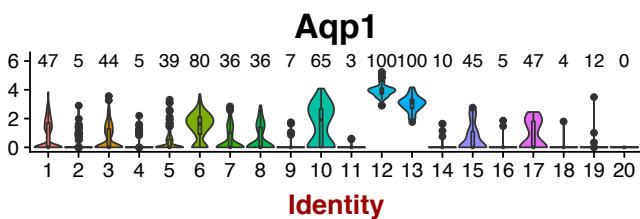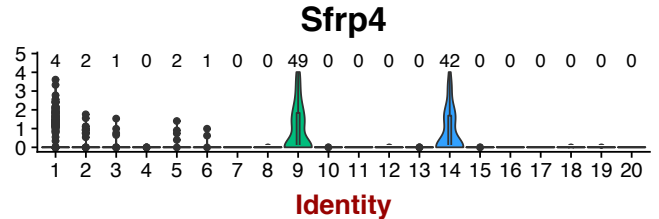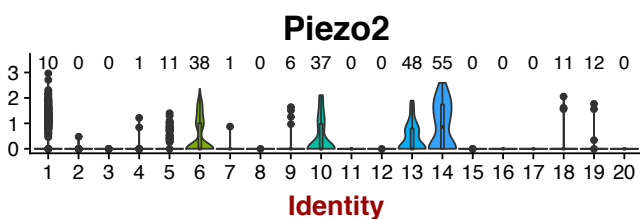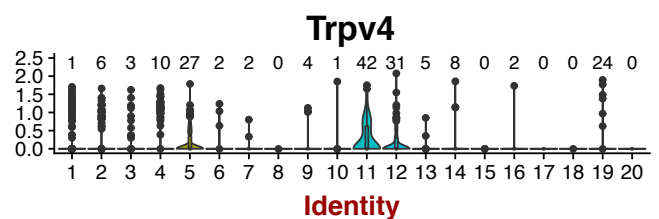

**Figure S8**

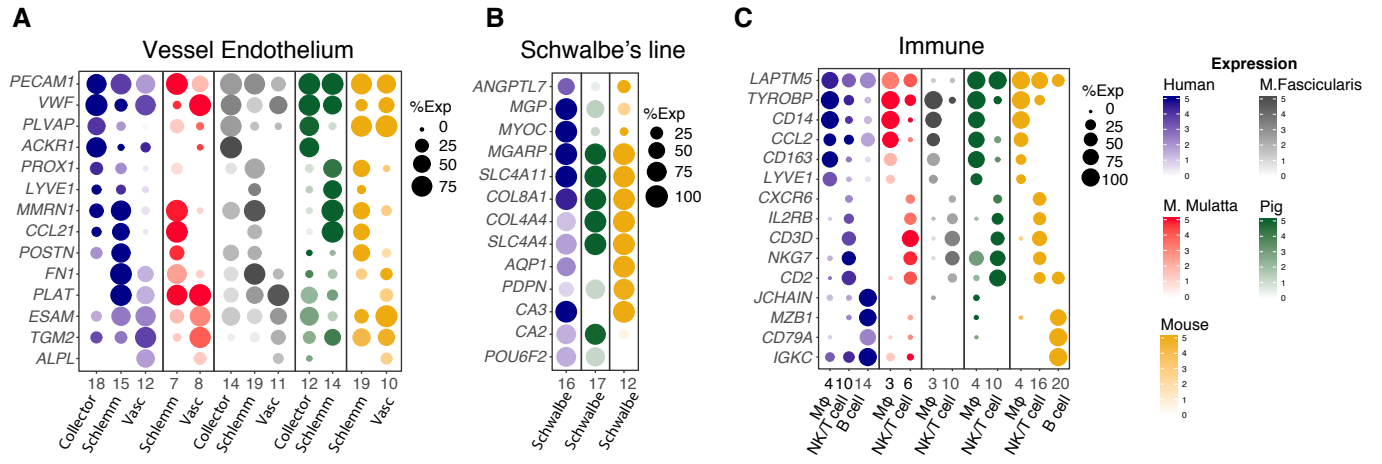

**Table S1. Donor Information (scRNA-seq)**

| <b>Label</b> | <b>Source</b> | <b>10X</b> | <b>Age</b> | <b>Sex</b> | <b>Cause of Death</b>                                                     | <b>DTP (Hours)</b> | <b>Sample ID</b> |
|--------------|---------------|------------|------------|------------|---------------------------------------------------------------------------|--------------------|------------------|
| Pt1-LT       | MGH           | v2         | 74         | M          | Lung cancer                                                               | 6                  | H1TM1            |
| Pt2-RT       | MGH           | v2         | 78         | M          | Metastatic melanoma to brain                                              | 14                 | H2TM1            |
| Pt2-LT       | MGH           | v2         | 78         | M          | Metastatic melanoma to brain                                              | 14                 | H2TM2            |
| Pt3-RT       | MGH           | v2         | 60         | M          | Left tonsillar squamous cell carcinoma metastatic to brain and left orbit | 6.5                | H3TM1            |
| Pt4-LT       | MGH           | v2         | 64         | M          | Diffuse B cell lymphoma spread to thorax and epigastrium                  | 5                  | H4TM1            |
| Pt9-LT       | MGH           | v2         | 53         | F          | Interstitial Lung Disease                                                 | 5                  | H9RimS1          |
| Pt11-RT      | MGH           | v3         | 65         | M          | Metastatic melanoma                                                       | 3                  | H11TM1           |



**Table S2. Donor Information (Histology)**

| Label    | Source | Age | Sex | Cause Of Death                          | DTP (hours) | RNA <i>in situ</i>           | IHC                            |
|----------|--------|-----|-----|-----------------------------------------|-------------|------------------------------|--------------------------------|
| Pt5-LT   | MGH    | 44  | F   | Diffuse B cell lymphoma                 | 5           | N/A                          | LYVE1, CD163, CHRM3, DES       |
| Pt6-LT   | MGH    | 69  | M   | Metastatic melanoma                     | 3           | PPP1R1B, TMEFF2, TFF3, POSTN | CALB2, IL1RL1, CD27            |
| Pt7-LT   | MGH    | 52  | F   | Traumatic brain hemorrhage              | 4           | ANGPTL7, CHI3L1              | N/A                            |
| Pt10-RT  | MGH    | 76  | M   | Metastatic melanoma                     | 7           | N/A                          | PDPN and PECAM1                |
| Pt11-RT  | MGH    | 65  | M   | Metastatic melanoma                     | 3           | RARRES1, CYP1B1              | N/A                            |
| HCS6-RT  | LVG    | 26  | F   | Acute respiratory failure               | 10          | N/A                          | CDH19, DES                     |
| HCS13-LT | LVG    | 22  | F   | Multiorgan failure                      | 10          | N/A                          | ACKR1, PECAM1, DES, MLANA, HUD |
| HCS15-RT | LVG    | 87  | F   | Hemorrhagic shock                       | 9           | N/A                          | PECAM1, ALPL                   |
| HCS17-RT | LVG    | 42  | M   | Upper gastrointestinal bleed, cirrhosis | 23.5        | N/A                          | PDPN, AQP1                     |
| HCS18-LT | LVG    | 62  | F   | Sepsis                                  | 18          | N/A                          | NDUFA4L2, PECAM1               |
| HCS19-RT | LVG    | 62  | F   | Sepsis                                  | 18          | N/A                          | RARRES1, PDPN, FABP4, ADH1B    |

Table S3. Antibodies and probes used for histological studies

| <b>Antibody/Probe</b>                          | <b>Source</b>           | <b>Identifier</b>    |
|------------------------------------------------|-------------------------|----------------------|
| Goat Polyclonal anti-Desmin                    | R&D Systems             | Cat #AF3844          |
| Rabbit Polyclonal anti-CD31/Pecam-1            | Novus Biologicals       | Cat #NB100-2284      |
| Mouse Monoclonal anti-alcohol dehydrogenase 1B | Novus Biologicals       | Cat #NBP2-00649      |
| Sheep Polyclonal anti-Podoplanin               | R&D Systems             | Cat #AF3670          |
| Rabbit Monoclonal anti-FABP4                   | Abcam                   | Cat #ab92501         |
| Rabbit Polyclonal anti-RARRES1                 | LifeSpan BioSciences    | Cat #LS-C402827      |
| Goat Polyclonal anti-DARC                      | Novus Biologicals       | Cat #NB100-2421      |
| Rabbit Polyclonal anti-Periostin               | ThermoFisher Scientific | Cat #PA5-34641       |
| Rabbit Polyclonal anti-AQP1                    | Proteintech             | Cat #20333-1-AP      |
| Mouse Monoclonal anti-Melan-A                  | Proteintech             | Cat #60348-1-Ig      |
| Goat Polyclonal anti-LYVE-1                    | R&D Systems             | Cat #AF2089          |
| Mouse Monoclonal anti-CD163                    | R&D Systems             | Cat #MAB1607         |
| Rabbit Polyclonal anti-Calretinin              | Swant                   | Cat #7697            |
| Rabbit Polyclonal Anti-NDUFA4L2                | LifeSpan BioSciences    | Cat #LS-B9847        |
| Rabbit Polyclonal Anti-HuD                     | ThermoFisher Scientific | Cat #PA5-79199       |
| Rabbit Polyclonal Anti-Cadherin 19             | LifeSpan BioSciences    | Cat #LS-C354596      |
| Goat Polyclonal Anti-Alkaline Phosphatase      | ThermoFisher Scientific | Cat #PA5-47419       |
| Rabbit Polyclonal Anti-Podoplanin              | LifeSpan BioSciences    | Cat #LS-B15911       |
| Hamster Monoclonal Anti-Podoplanin-647         | Novus Biologicals       | Cat #NB600-1015AF647 |
|                                                |                         |                      |
| RNAscope® Probe-Hs-TMEFF2                      | ACDBio                  | Cat #519741          |
| RNAscope® Probe-Hs-PPP1R1B                     | ACDBio                  | Cat #477021          |
| RNAscope® Probe-Hs-CHI3L1                      | ACDBio                  | Cat #408121          |
| RNAscope® Probe-Hs-ANGPTL7                     | ACDBio                  | Cat #552811          |
| RNAscope® Probe-Hs-CYP1B1                      | ACDBio                  | Cat #457621          |
| RNAscope® Probe-Hs-RARRES1                     | ACDBio                  | Cat #494851          |
